# Supplementary material for: Competition-Induced Binding Spherical Nucleic AcidFluorescence Amplifier for the Detection of Di (2-ethylhexyl) Phthalate in the Aquatic Environment
Source: MDPI journal article supplement (doi:10.3390/nano12132196), 2022-06-26
Supplement: s1 [file s1]

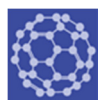

Supplementary Materials

# Competition-Induced Binding Spherical Nucleic Acid Fluorescence Amplifier for the Detection of Di (2-ethylhexyl) Phthalate in the Aquatic Environment

Lin Yuan<sup>†</sup>, Dandan Ji<sup>\*,†</sup>, Qiang Fu and Mingyang Hu

College of Environmental Science and Engineering, Qilu University of Technology (Shandong Academy of Science), Jinan 250353, China; [m17862975991@163.com](mailto:m17862975991@163.com) (L.Y.); [jnhmy17854118089@163.com](mailto:jnhmy17854118089@163.com) (Q.F.); [mi-cro7306@163.com](mailto:mi-cro7306@163.com) (M.H.)

\* Correspondence: [jdd@qlu.edu.cn](mailto:jdd@qlu.edu.cn); Tel: +86-0531-8963-1680

† These authors contributed equally to this work and should be considered co-first authors.

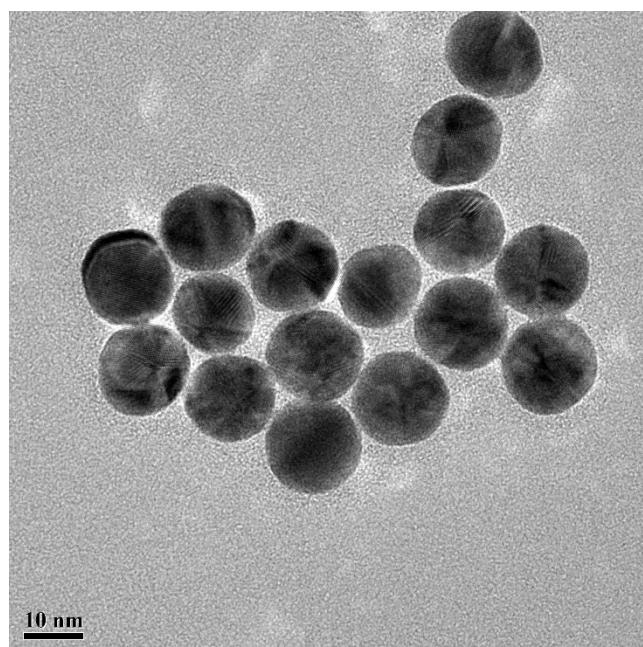

**Figure S1.** TEM image of 20nm AUNPs.

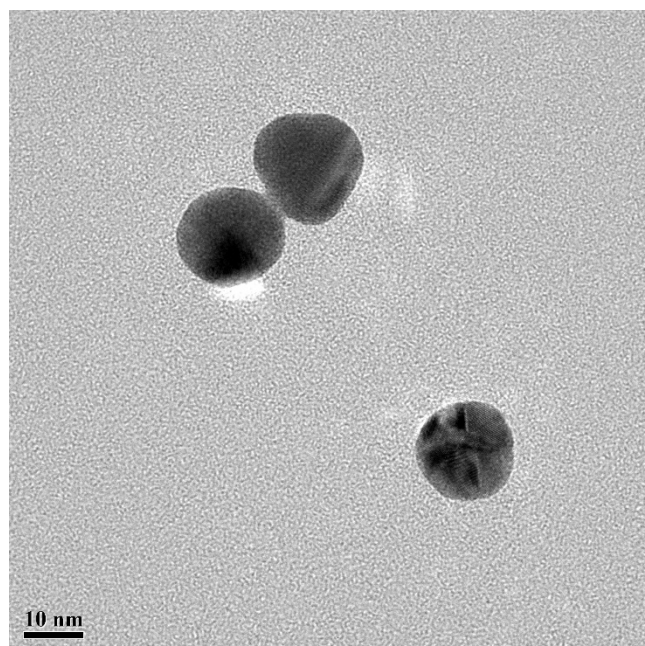

**Figure S2.** TEM image of SNA.

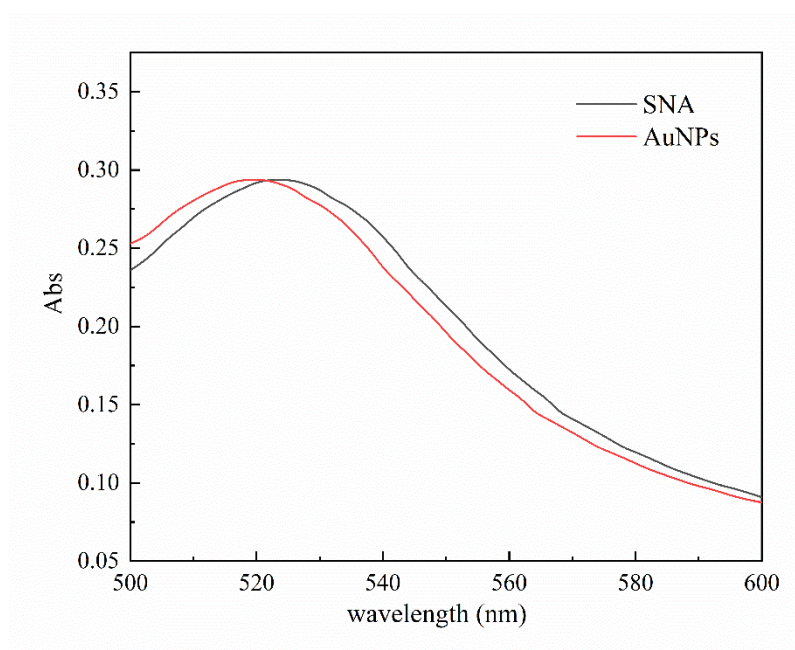

**Figure S3.** The UV absorption spectra of AuNPs and SNA.
